## ALLOSTERIC INTERACTIONS GOVERNING OXYGEN EQUILIBRIA IN THE HAEMOGLOBIN SYSTEM OF THE SPINY DOGFISH, *SQUALUS ACANTHIAS*

By ROY E. WEBER, RUFUS M. G. WELLS\* AND JOHN E.  
ROSSETTI

*Institute of Biology, Odense University, Campusvej 55, DK-5230 Odense M,  
Denmark*

(Received 31 May 1982—Accepted 20 October 1982)

### SUMMARY

The oxygenation-linked, allosteric interactions of erythrocytic organic phosphates and urea with the haemoglobin (Hb), and the functional significance of the Hb multiplicity, were studied in an elasmobranch, *Squalus acanthias*.

The autochthonous red cell nucleoside triphosphates (NTP) ATP and GTP (guanosine triphosphate) strongly depress O<sub>2</sub> affinity of the stripped (cofactor-free) Hb and increase cooperativity in O<sub>2</sub> binding. As previously found in teleost Hbs, GTP exerts a greater effect than ATP at the same concentration. Urea, in contrast, increases O<sub>2</sub> affinity and depresses cooperativity. It also antagonizes the modulator effectivity of NTP at physiological NTP/Hb concentration ratios.

Deoxygenation of the Hb raises blood pH. This Haldane effect contrasts with earlier findings for Pacific specimens, but accords with the presence of a Bohr effect ( $\phi = \Delta \log P_{50} / \Delta \text{pH}$ ).

*S. acanthias* Hb resolves into six main components (three pairs) on the basis of isoelectric point. There is no evidence for radical functional differentiation as found in teleosts with electrophoretically anodal and cathodal Hb components.

The physiological implications of the findings and the possible molecular mechanisms basic to the NTP and urea effects are discussed.

### INTRODUCTION

The red cells of teleost fish contain high concentrations of ATP, often in concurrence with guanosine triphosphate (GTP) (Parks *et al.* 1973; Geoghegan & Poluhowich, 1974; Weber & Lykkeboe, 1978; Bartlett, 1980). These nucleoside triphosphates (NTP) depress the O<sub>2</sub> affinity of the haemoglobin (Hb) by allosteric interaction as does 2,3-diphosphoglycerate (DPG) in human red blood cells (Benesch & Benesch, 1967; Chanutin & Curnish, 1967). Changes in their concentrations correlate neatly with adaptive modulation of blood O<sub>2</sub> affinity in teleosts in response to changed environmental or metabolic stimuli (reviewed by Weber, 1982). Where

\* Present address: Department of Zoology, University of Auckland, Auckland, New Zealand.

Key words: Elasmobranch, haemoglobins, allosteric interactions.

present, GTP appears to play the greater role, as evident from its greater depressant effect on  $O_2$  affinity and its lesser inhibition by divalent cations compared to ATP under identical *in vitro* conditions (Weber, Lykkeboe & Johansen, 1975; Weber & Lykkeboe, 1978).

Very little is known about the effects of erythrocytic cofactors on Hb function in the elasmobranchs, despite a tantalizing variation in type and concentration of potential ligands encountered. The erythrocytic ATP/GTP ratios vary tremendously – from less than unity in the school shark, *Galeorhinus australis*, to about 6 and 12 in the dogfishes *Squalus acanthias* and *Scyliorhinus canicula*, respectively (Coates, Paton & Thompson, 1978; Leray, 1979; Wells & Weber, 1983). Some species, e.g. the ray *Narcacacion nobiliana* and *Squalus acanthias*, additionally contain small concentrations of inositol pentaphosphate (IPP) (Borgese & Nagel, 1978), the allosteric cofactor common in birds. Importantly, the erythrocytes of marine elasmobranchs also contain high concentrations of urea (near 0.5 M, Browning, 1978) where it serves an osmotic function. Urea, however, also binds to carboxyl groups of proteins like Hb (Krichevskaya, Lukash & Kartasheva, 1973) whereby it may influence its oxygenation properties.

Fish and other ectothermic vertebrates frequently possess multiple Hb systems. Many teleost fish possess anodal Hb components, whose  $O_2$  affinities generally are highly sensitive to organic phosphates, pH and temperature, and cathodal ones with higher  $O_2$  affinities and lower sensitivities to these factors (Binotti *et al.* 1971; Brunori, 1975; Weber, Wood & Lomholt, 1976; Weber, 1982). No information on the functional consequences of Hb multiplicity seems to be available for elasmobranchs, although they have highly variable patterns of Hb heterogeneity (Fyhn & Sullivan, 1975) which frequently also are polymorphic.

We studied the influences of potential erythrocytic modifiers of  $O_2$  affinity (NTP and urea) on the composite and isolated Hbs, and the functional significance of Hb heterogeneity in the dogfish, *Squalus acanthias*, where the allosteric interactions are of additional interest in view of the almost complete dissociation of the tetrameric deoxygenated Hb molecules to dimeric halves upon oxygenation *in vitro* (Fyhn & Sullivan, 1975). We also report the dependence of blood pH on oxygenation at constant  $CO_2$  tension, and the  $O_2$  affinity in the Hb from juvenile specimens. The preceding paper (Wells & Weber, 1983) deals with the oxygenational properties of the whole blood and the regulation of  $O_2$  affinity during *in vitro* incubation of the red cells.

#### MATERIALS AND METHODS

The study is based on seven specimens of the spiny dogfish, *Squalus acanthias* L., about 70–90 cm in length and 4–7 kg in weight. The sharks were caught by Esbjerg fishermen and kept at Esbjerg Marine Aquarium ('Fiskerimuseet') in sea water of about 35‰ salinity and at 10–15 °C until use. We also used blood from a batch of 2-week-old, 30–40 g juveniles that were born in the aquarium.

Whole blood samples were obtained by acute venepuncture. This technique, together with those used for estimating haematocrit and for enzymic and chromatographic assay of the concentrations of ATP and guanosine triphosphate (GTP), are detailed elsewhere (Wells & Weber, 1983).

The relationship between CO<sub>2</sub> tension and pH in oxy- and deoxygenated blood was investigated by equilibrating 75  $\mu$ l aliquots of blood in Radiometer BMS-II tonometers with gas mixtures containing varying CO<sub>2</sub> tensions, and O<sub>2</sub> tensions of either zero or 148–155 mm, balance N<sub>2</sub>, for 20 min at 20 °C. These gas mixtures were prepared with Wösthoff gas mixing pumps using 99.995 % pure N<sub>2</sub>. Millimolar bicarbonate concentrations were calculated from the Henderson-Hasselbalch equation as  $10^{(pH-pK')}\alpha_{CO_2}P_{CO_2}$  using a value for the CO<sub>2</sub> solubility coefficient ( $\alpha_{CO_2}$ ) of 0.04400 mmol l<sup>-1</sup> mmHg<sup>-1</sup>, calculated from Pleschka & Wittenbrock's (1971) data for dogfish, and pK'<sub>1</sub> values interpolated from those given by Albers & Pleschka (1967) for elasmobranchs where pK'<sub>1</sub> at 20 °C and pH 7.4 (corresponding to 77 % CO<sub>2</sub> solubility in pure water) equals 6.042, and where pK'<sub>1</sub>/°C = -0.008 and pK'<sub>1</sub>/pH = -0.097.

Hb solutions were prepared by osmotic-shock and ultrasonification of red cells that had been washed 2–3 times in filtered sea water or 2 % saline. The Hb was stripped of ionic cofactors by chromatography on Sephadex G25 Superfine, as preliminary attempts to strip samples with Amberlite MB 3 mixed ion exchange resin resulted in methaemoglobin formation. Other procedures for preparing haemolysates, administering cofactors and separating multiple Hbs were carried out as described earlier (Weber, Lykkeboe & Johansen, 1976; Weber & Lykkeboe, 1978) except that some O<sub>2</sub> equilibria were measured in Na-Hepes instead of Tris-Cl buffer (specified in legends).

A modified diffusion chamber technique (Weber, 1981) was used for measuring O<sub>2</sub> equilibria, evaluating cooperativity coefficients at half saturation ( $n$ ) from the slopes of Hill plots (Hill, 1910). The effects of urea at varying ATP concentrations were investigated by preparing stock solutions of stripped Hb, ATP, urea, and Na-Hepes buffer, each containing 0.09 M of the buffer and 0.09 M-NaCl, then mixing these in the desired proportions. The apparent heat of oxygenation ( $\Delta H_{app}$ ) was calculated from the derived van't Hoff equation (Wyman, 1948) as  $R\Delta \ln P_{50}/\Delta(1/T)$  where R is the gas constant (8.3143 J K<sup>-1</sup> mol<sup>-1</sup>) and T the absolute temperature.

## RESULTS

### *O<sub>2</sub> affinity and its dependence on protons, organic phosphates, urea and temperature*

The stripped Hb showed a high O<sub>2</sub> affinity, a weak Bohr effect (at 10 °C and pH 7.85,  $P_{50} = 2.3$  and  $\phi = -0.21$ ) and very slight cooperativity ( $n = 1.05$ ) which increased slightly with falling pH (Fig. 1). The O<sub>2</sub> affinity was much higher than that found in the whole blood ( $P_{50} = 13$  mmHg – Wells & Weber, 1983).

The Bohr effect of the stripped Hb was slightly greater at 2 °C than at 15 °C ( $\phi = 0.26$  and  $-0.21$  respectively – Fig. 2). The overall heat of oxygenation ( $\Delta H_{app}$ , which includes the heat of solution of oxygen) was -35 and -44 KJ (mol O<sub>2</sub>)<sup>-1</sup> at pH 7.0 and 7.9. This pH dependence of  $\Delta H$  is compatible with greater proton binding at low pH. The haemolysate from juvenile specimens had a higher intrinsic O<sub>2</sub> affinity than the cofactor-free maternal Hb (Fig. 2), indicating that this difference contributes to the maternal-foetal O<sub>2</sub> transfer in *S. acanthias*.

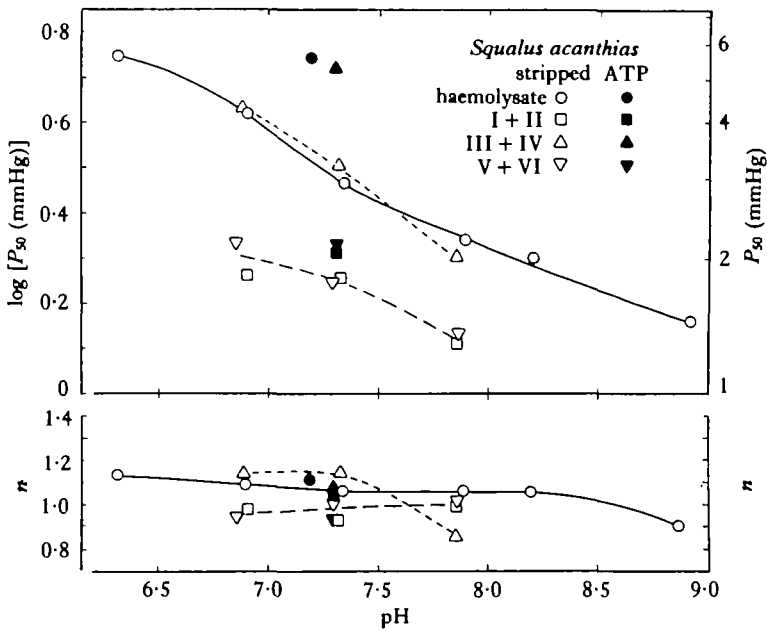

Fig. 1.  $O_2$  tensions and cooperativity coefficients at half-saturation ( $P_{50}$  and  $n_{50}$ , respectively) and their pH dependence, in the stripped, composite haemolysate (○, ●) and in Hb fractions I + II (□, ■), III + IV (△, ▲) and V + VI (▽, ▼) measured in Tris/bis Tris buffer, ionic strength 0.05. Haem concentration, 0.3–0.4 mM (haemolysate and Hbs III + IV) and 0.1 mM (Hbs I + II and V + VI). Open and closed symbols, Hbs in the absence and presence of ATP, respectively. ATP: Hb ratios (mol/mol), 1.0.

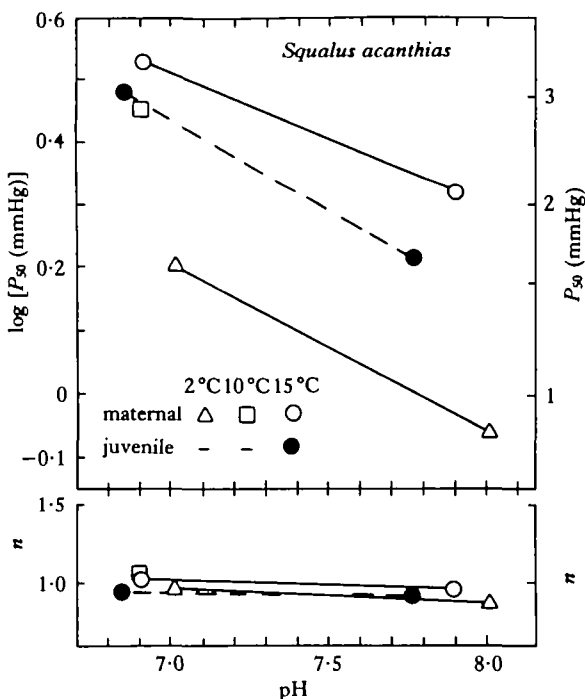

Fig. 2.  $P_{50}$  and  $n_{50}$  values of the stripped haemolysate of adult specimens at 2, 10 and 15°C (△, □ and ○) compared with that of juvenile specimens at 15°C (●), measured in 0.1 M-Na-Hepes buffer. Haem concentrations, 0.12 mM.

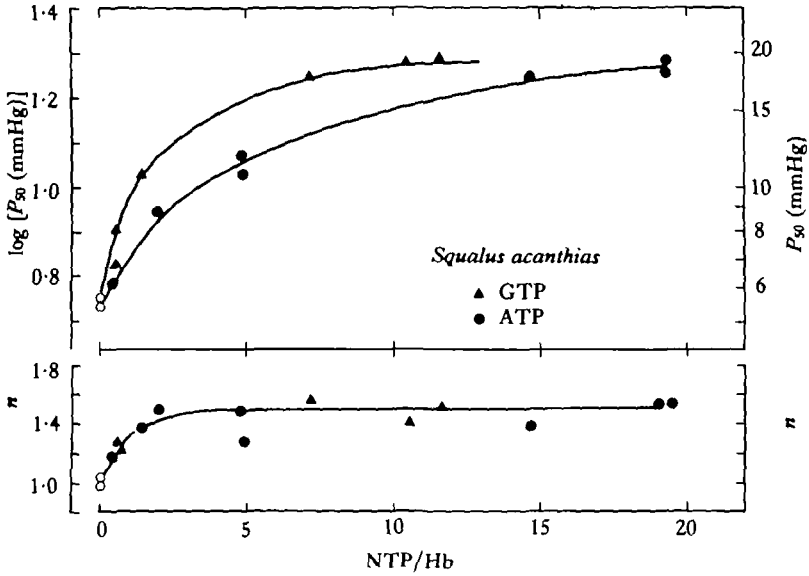

Fig. 3. Effects of ATP (●) and GTP (▲) on  $P_{50}$  and  $n_{50}$  of the stripped haemolysate measured at 15°C, pH 7.28 in 0.10 M-Na-Hepes buffer. Haem concentration, 0.4 mM.

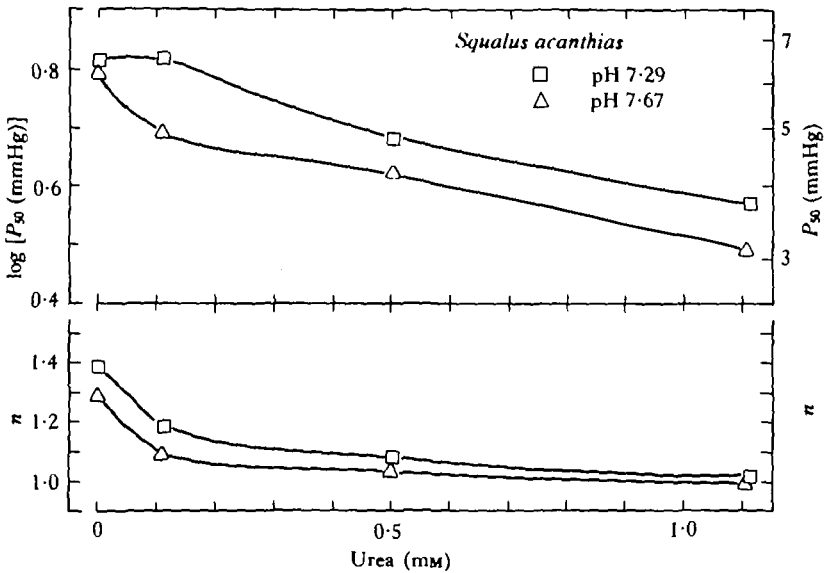

Fig. 4. Effects of urea on  $P_{50}$  and  $n_{50}$  of the stripped haemolysate at pH 7.29 (□) and 7.67 (Δ) measured at 15°C in 0.10 M-Na-Hepes buffer. Haem concentration, 0.31 mM.

GTP decreased  $O_2$  affinity more than ATP at the same phosphate:Hb ratio, as previously established in teleost fish, where both these factors are found (cf. Weber *et al.* 1975). The phosphates exerted greater effect on  $P_{50}$  at lower concentration ratios and raised  $n$  from about 1 to 1.5 (Fig. 3).

The influence of urea on Hb oxygenation and the implications of its concurrence with ATP are illustrated in Figs 4, 5 and 6. Urea increased the  $O_2$  affinity of *Squalus*

Hb and decreased its cooperativity (Fig. 4); the affinity effect was greater at pH 7.3 than pH 7.5. Urea also reduced the sensitivity of O<sub>2</sub> affinity to ATP (Fig. 5). Thus, in the absence of urea, ATP (at 1.5 molar excess over Hb tetramers) decreased O<sub>2</sub> affinity below pH 7.5; in the presence of 0.4 M-urea this effect was evident only at pH below ~7.25 (Fig. 6). These observations suggest antagonism between oxygenation-linked binding of the two metabolites. Curiously, ATP increased O<sub>2</sub>-affinity of the Hb at high pH (in the absence or presence of urea - Fig. 6).

#### *Influence of Hb oxygenation on blood bicarbonate and buffer capacity*

Fig. 7A, B shows the variations of CO<sub>2</sub> tension and bicarbonate concentration with pH for oxygenated and deoxygenated *S. acanthias* blood. The higher pH in the deoxygenated Hb at the same CO<sub>2</sub> tension (the Haldane effect) reflects binding of the Bohr protons to the Hb upon liberation of O<sub>2</sub> and a resultant increase in blood bicarbonate concentration ( $\Delta\text{HCO}_3^- = 1.4 \text{ mmol l}^{-1}$  at pH 7.9). The buffer capacity ( $\Delta\text{HCO}_3^-/\Delta\text{pH}$ ) decreased from about 10 and 11.8 mol (pH unit)<sup>-1</sup> for deoxy- and oxygenated blood at pH 7.85, to about 2.4 and 4.0 respectively, at pH 7.0.

#### *Hb multiplicity*

Electrophoresis revealed the presence of three main anodal Hb bands in the adult as well as juvenile stages and showed no evidence for polymorphic variation in the material used. In preparative iso-electric focusing each of these bands resolved into two components; these six components accounted for at least 95 % of total haem (Fig. 8). At 10°C the carboxy derivatives of the three pairs of components (I + II, III + IV and V + VI in Fig. 8) were isoelectric near pH values of 7.7, 7.4 and 6.9, respectively. O<sub>2</sub> equilibrium properties (incorporated into Fig. 1) showed that in the pH range of 7.0 to 7.9, which embraces physiological conditions, the most abundant fraction

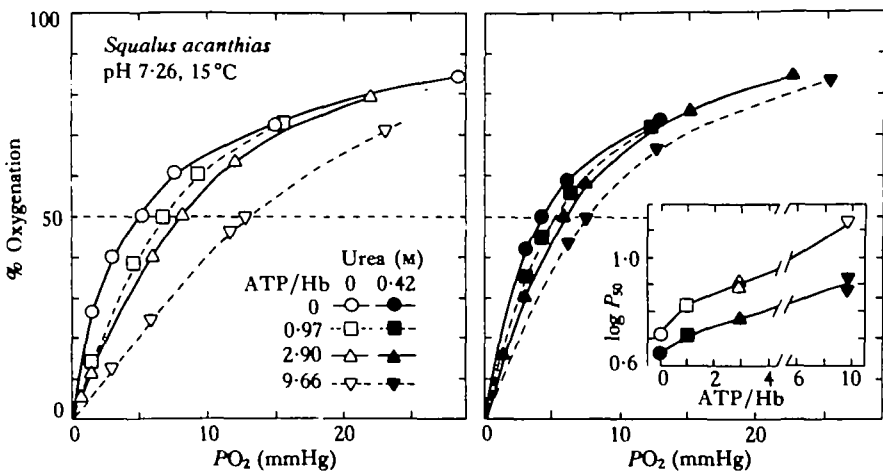

Fig. 5. Effects of urea on O<sub>2</sub> equilibria of the stripped haemolysate measured at 15°C and pH 7.26 in the absence (open symbols) and presence (closed symbols) of 0.42 M-urea, in 0.1 M-Na-Hepes buffer. Haem concentration, 0.41 mM; ATP/Hb (mol/mol) ratios, 0 (○, ●), 0.97 (□, ■), 2.90 (△, ▲) and 9.66 (▽, ▼).

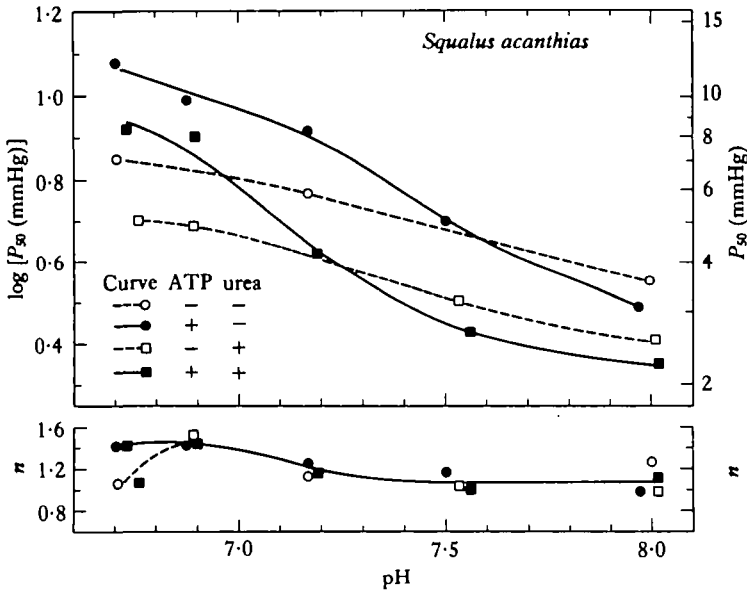

Fig. 6. Dependence of  $P_{50}$  and  $n_{50}$  of the stripped haemolysate on pH in the absence of added ligands (○) and in the presence of ATP (●), urea (□) and ATP + urea (■) measured at 15°C in 0.1 M-Na-Hepes buffer. Haem concentration, 0.30 mM; urea (where present), 0.46 M; ATP/Hb (mol/mol) ratio, 1.51.

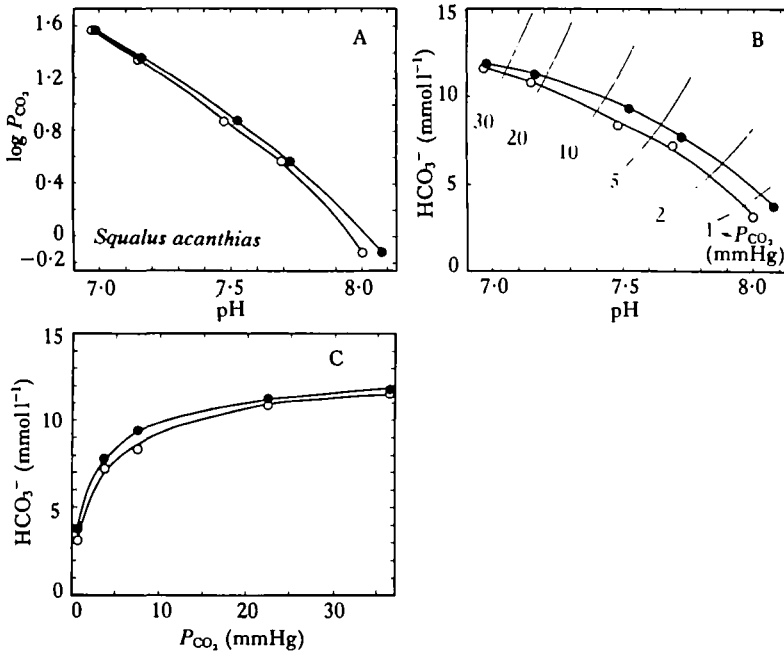

Fig. 7. Influence of haemoglobin oxygenation on (A) the  $P_{CO_2}$ -pH relationship, (B) the bicarbonate-pH relationship and (C) the bicarbonate- $P_{CO_2}$  relationship, measured in a blood sample containing 0.93 mM-haem at 20°C. ○, oxygenated Hb; ●, deoxygenated Hb.

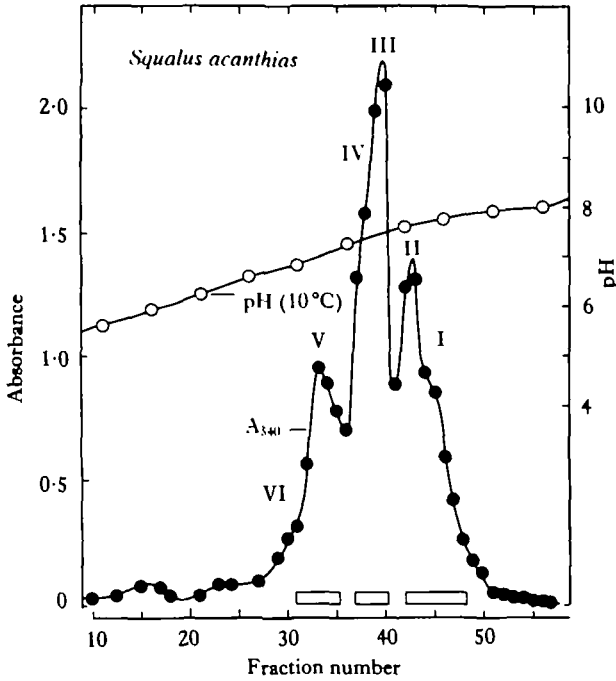

Fig. 8. Isolation of component Hbs by isoelectric focusing in solutions of ampholines (LKB, Sweden) with pH ranges of 5 to 8 (0.42%) and 3.5 to 10 (0.28%). Open horizontal bars, fractions pooled for O<sub>2</sub> equilibrium determinations (given in Fig. 1).

(III + IV) had a similar O<sub>2</sub> affinity to the haemolysate but a slightly larger Bohr effect ( $\phi = -0.35$ ), whereas fractions I + II and V + VI had smaller pH effects ( $\phi$  near  $-0.18$ ) and higher O<sub>2</sub> affinities. Again, ATP had a lesser effect on O<sub>2</sub> affinity of fractions I + II and V + VI than on those of the main fraction (III + IV) or the whole haemolysate. The closeness of the isoelectric points and the resultant difficulty in completely separating the main fraction (III + IV) from the smaller adjacent ones (cf. Fig. 8) suggest that the above differences will be more pronounced in pure, isolated components.

#### DISCUSSION

The high O<sub>2</sub> affinity ( $P_{50} = 2.3$  at pH 7.85 and 10 to 15°C), low cooperativity ( $n = 1.05$ ) and small Bohr factor ( $\phi = -0.20$ ) of stripped *Squalus acanthias* Hb conform broadly with corresponding earlier findings for other elasmobranchs (Manwell, 1963; Pennelly, Noble & Riggs, 1975; Mumm, Atha & Riggs, 1978; Martin *et al.* 1979). The available information thus suggests that homotropic and heterotropic intramolecular interactions will only play a modest role in adapting O<sub>2</sub> transport by haemoglobin in sharks, skates and rays to environmental and metabolic changes.

Unlike in teleost fish, where the alkaline Bohr effect disappears at high and low pH, that of *Squalus acanthias* is manifest over an extremely wide pH range (6.3 to 8.9), reflecting the implication of several acid groups with widely different pK values. The



was also evident in stingray, *Dasyatis*, Hb (Mumm *et al.* 1978). The higher Bohr factor seen in the whole blood ( $\phi = -0.28$ , Wells & Weber, 1983) is consistent with the allosteric interaction of anionic erythrocytic phosphates, which raise  $\phi$  by increased binding to Hb at low pH.

The rise in the Bohr effect as pH decreases from 8 to 7 (Fig. 1) correlates with the concomitant decrease in the temperature effect ( $\Delta H = -44$  and  $-36$  KJ mol<sup>-1</sup> at pH 8 and 7—cf. Fig. 2), suggesting that the latter phenomenon results from endothermic protonation reactions that subtract from the exothermic oxygenation reaction proper. The overall heats of oxygenation fall within the range for Hbs from other vertebrate classes (Rossi-Fanelli, Antonini & Caputo, 1964) but not for the Hb from the porbeagle shark, *Lamna nasus*, where a  $\Delta H$  value near zero reflects the occurrence of two types of functional subunits with different sensitivities within the same tetramers (Andersen, Olson & Gibson, 1973).

The pronounced sensitivity of the O<sub>2</sub> affinity of *S. acanthias* Hb to ATP and GTP contrasts sharply with ATP insensitivities observed in the stingrays, *Dasyatis* and *Potamogon*, and the torpedo ray, *Torpedo nobiliana*, (Mumm *et al.* 1978; Martin *et al.* 1979; Bonaventura, Bonaventura & Sullivan, 1974*a,b*), but accords with findings for the Japanese shark *Triakis scyllia* (Kono & Hashimoto, 1977). The available information thus suggests that ATP sensitivity may differ between the selachian (sharks) and batoidean (skates and rays) elasmobranchs.

The greater sensitivity of O<sub>2</sub> affinity of *Squalus* Hb to GTP than to ATP aligns the elasmobranchs with the teleost fish (cf. Weber *et al.* 1975; Petersen & Poluhowich, 1976). GTP may be formed by successive phosphate transfers from ATP to GMP, catalysed by guanosine monophosphokinase (GMPK) and nucleodiphosphokinase (NDPK) (cf. Weber, 1982). Both these enzymes occur in *Squalus acanthias* erythrocytes (0.05 and 25 units/ml cells, respectively, Parks *et al.* 1973). Such ATP to GTP conversion would increase the modulator effectivity of the erythrocytic NTP, and may moreover account for the remarkable intraspecific variability in ATP/GTP ratio encountered in some species (e.g. the smooth dogfish, *Mustelus canis*, Borgese *et al.* 1978). Studies on the kinetic rates of ligand reactions in the Hb of the stingray *Potamotrygon* (Martin *et al.* 1979) show that ATP decreases O<sub>2</sub> affinity by raising the rate of O<sub>2</sub> dissociation without affecting that of ligand association, while proton binding (the Bohr effect) affects both rates. This picture is complicated by an observation of kinetic heterogeneity in Hb from the carpet shark, *Cephaloscyllium*, in the absence of phosphate cofactors. This appears to be a point of difference between elasmobranch and teleost haemoglobins (Brittain, Barber, Greenwood & Wells, 1982).

Urea markedly increases the O<sub>2</sub> affinity of *Squalus acanthias* Hb, as observed in Hbs of man (Rossi-Fanelli *et al.* 1964) and the toad, *Xenopus laevis*, where urea levels rise in response to salt-water acclimation and aestivation (Jokumsen & Weber, 1980). In contrast, Hb-O<sub>2</sub> affinity is virtually independent of urea concentration in the clearnose skate, *Raja*, the Amazonian stingray, *Potamotrygon*, (Bonaventura *et al.* 1974*a,b*; Martin *et al.* 1979) and in the African lungfish, *Protopterus*, which experiences high urea concentrations during aestivation (Weber, Johansen, Lykkeboe & Maloiy, 1977). Within elasmobranchs these data thus show a dichotomy which coincides with the selachian-batoidean differentiation.

Kinetic carbon monoxide binding studies with *Raja* Hb indicate that urea insensitivity is dependent on the integrity of the tetrameric molecular structure of the Hb, whereas the urea-sensitive, human Hb dimerizes extensively in the presence of urea (Bonaventura *et al.* 1974*a,b*). In this light the large urea sensitivity of *Squalus* Hb correlates with evidence that 94% of non-oxidized pigment in solution consists of dimers, which aggregate to tetramers upon deoxygenation (Fyhn & Sullivan, 1975). That molecular dissociation alone will not account for the urea-induced increase in O<sub>2</sub>-affinity, however, follows from the persistence of the ATP effect in the presence of urea, since ATP modulation, in analogy with mammalian Hb and DPG, is dependent upon the integrity of the tetrameric structure.

Urea decreases the effect of ATP on O<sub>2</sub> affinity (Figs 5, 6). This suggests that *in vitro* oxygenation studies conducted in the absence of urea overestimate the modulator role of the phosphate in elasmobranchs. Urea, however, does not obliterate NTP sensitivity completely (see Fig. 5). Hypoxic incubation of intact *S. acanthias* erythrocytes decreases cellular NTP and increases O<sub>2</sub>-affinity (Wells & Weber, 1983).

The effect of urea on the oxygen equilibria may be due to oxygenation linked binding of this cationic compound to the negatively charged carboxyl termini of the polypeptide chains of Hb. Binding to Hb and other intracellular proteins at these sites is consistent with the greater effect of urea on O<sub>2</sub> affinity at high pH (Fig. 4), where the carboxyl groups will show greater ionization. Such binding may explain the higher urea concentrations in erythrocytes than in plasma (Krichevskaya *et al.* 1973; Browning, 1978) since urea diffuses freely through the erythrocyte membrane (Hunter, 1976). Urea binding at the carboxyl groups might thus increase affinity by hindering the oxygenation-linked binding at these sites of the Bohr protons which have a negative effect on O<sub>2</sub>-affinity (removal of the C-terminal histidines of the  $\beta$  chains of human Hb decreases its Bohr effect by half – Kilmartin & Wootton, 1970). Urea may also affect O<sub>2</sub> affinity of Hbs due to its spontaneous conversion to cyanate, resulting in the slow, irreversible carbamylation of the NH<sub>2</sub>-terminal valine residues of the Hb protein chains (Cerami *et al.* 1973; Bonaventura *et al.* 1974*a,b*). Carbamylation of these  $\alpha$ -amino N-termini would explain the urea induced reduction of the ATP-effect (since those of the  $\beta$ -chains contribute two of the seven positively charged sites where DPG interacts in human Hb – cf. Arnone, 1972). The irreversibility of the carbamylation reaction and the fact that the amino terminal residue of stingray Hb is 'uncarbamylated' valine (Mumm *et al.* 1978), however, appear to be evidence against the implication of this reaction in the urea effect.

In whole blood, the Hb of *Squalus acanthias* shows a distinct Haldane effect. Curiously, Lenfant & Johansen (1966) found no such effect in the Pacific *S. suckleyi* (which now is considered to be *S. acanthias*). A Haldane effect is also lacking in the dogfish, *Scyliorhinus stellaris* and *Mustelus mustelus*, and in the electric ray, *Torpedo ocellata* (Albers & Pleschka, 1967). These data predict the absence of a Bohr effect in the latter three species (as recorded for *S. suckleyi*, Lenfant & Johansen, 1966). Since the Haldane effect is a thermodynamic consequence of the Bohr effect the presence of both effects in the Hb of *S. acanthias* appears to be internally consistent. The steepness of the (HCO<sub>3</sub><sup>-</sup>)/P<sub>CO<sub>2</sub></sub> curve at low, physiological CO<sub>2</sub> tensions suggests transport of significant blood CO<sub>2</sub> as bicarbonate. Our values for the log P<sub>CO<sub>2</sub></sub>/pH relationsh

■-1.9 to -2.1) and buffering capacity (10–12 mM-HCO<sub>3</sub><sup>-</sup>/pH unit at pH 7.85 – Fig. 6A, B) agree well with those in other elasmobranchs (Albers & Pleschka, 1967).

We find at least six Hb components in *Squalus acanthias* compared to previous electrophoretic studies showing one and two components (Buhler & Shanks, 1959; Manwell, 1963). Although the shark haemolysate does not display such striking functional heterogeneity as teleosts with cathodal Hbs, there is evidence for some degree of molecular 'division of labour' – the main components showing higher heterotropic interactions (associated with proton and ATP binding) than the other components, with the composite haemolysate having intermediate properties (reflecting the absence of hybridization). The absence of radical functional heterogeneity and of large heterotropic interactions (see Results) in elasmobranch Hb may contribute to the low tolerance of elasmobranchs to variation in water O<sub>2</sub> tension, and to their low capacity for maintaining constant O<sub>2</sub> uptake rates as O<sub>2</sub> tension falls (cf. Piiper, Baumgarten & Meyer, 1970).

We thank the Danish Natural Science Research Council for support. R.M.G.W. obtained supplementary funds from the Auckland University Research Committee, New Zealand. Svend Toggaard, Esbjerg Fisheries Museum, kindly provided the dogfish. Renee Støvring, Hanne Juhl Rasmussen, Musse Olesen, Hanne Andersen and Jette Andersen, Odense, provided valuable technical assistance in preparation of the data, figures and manuscript.

## REFERENCES

- ALBERS, C. & PLESCHKA, K. (1967). Effect of temperature on CO<sub>2</sub> transport in elasmobranch blood. *Resp. Physiol.* **2**, 261–273.
- ANDERSEN, M. E., OLSON, J. S. & GIBSON, Q. H. (1973). Studies on ligand binding to hemoglobins from teleosts and elasmobranchs. *J. biol. Chem.* **248**, 331–341.
- ARNONE, A. (1972). X-ray diffraction study of binding of 2,3-diphosphoglycerate to human deoxyhaemoglobin. *Nature, Lond.* **237**, 146–149.
- BARTLETT, G. R. (1980). Phosphate compounds in vertebrate red cells. *Am. Zool.* **20**, 103–114.
- BENESCH, R. E. & BENESCH, R. (1967). The effect of organic phosphates from the human erythrocyte on the allosteric properties of hemoglobin. *Biochem. biophys. Res. Comm.* **26**, 162–167.
- BINOTTI, I., GIOVENCO, S., GIARDINA, B., ANTONINI, E., BRUNORI, M. & WYMAN, J. (1971). Studies on the functional properties of fish hemoglobins. II. The oxygen equilibrium of the isolated components from trout blood. *Archs Biochem. Biophys.* **142**, 274–280.
- BONAVENTURA, J., BONAVENTURA, C. & SULLIVAN, B. (1974a). Hemoglobin of the electric atlantic torpedo, *Torpedo nobiliana*: A cooperative hemoglobin without Bohr effect. *Biochim. biophys. Acta* **371**, 147–154.
- BONAVENTURA, J., BONAVENTURA, C. & SULLIVAN, B. (1974b). Urea tolerance as a molecular adaptation of elasmobranch hemoglobins. *Science, N.Y.* **186**, 57–59.
- BORGESSE, T. A. & NAGEL, R. L. (1978). Inositol pentaphosphate in fish red blood cells. *J. exp. Zool.* **205**, 133–140.
- BORGESSE, T. A., NAGEL, R. L., ROTH, E., MURPHY, D. & HARRINGTON, J. (1978). Guanosine triphosphate (GTP): The major organic phosphate in the erythrocytes of the elasmobranch *Mustelus canis* (smooth dogfish). *Comp. Biochem. Physiol.* **60B**, 317–321.
- BRITTAİN, T., BARBER, D., GREENWOOD, C. & WELLS, R. M. G. (1982). An investigation of the co-operative binding of carbon monoxide to the hemoglobin of carpet shark *Cephaloscyllium*. *Comp. Biochem. Physiol.* **72B**, 689–693.
- BROWNING, J. (1978). Urea levels in plasma and erythrocytes of the southern fiddler skate *Trygonorhina fasciata guanerius*. *J. exp. Zool.* **203**, 325–330.
- BRUNORI, M. (1975). Molecular adaptation to physiological requirements: The hemoglobin system of trout. In *Current Topics in Cellular Regulation*, Vol. 9, (eds B. L. Horecker & E. R. Stadtman), pp. 1–39. New York: Academic Press.
- HLER, D. R. & SHANKS, W. E. (1959). Multiple hemoglobins in fishes. *Science, N.Y.* **129**, 899–900.

- COATES, M., PATON, B. C. & THOMPSON, J. (1978). High levels of inosine monophosphate in the erythrocyt of elasmobranchs. *J. exp. Zool.* **203**, 331-337.
- CERAMI, A., MANNING, J. M., GILLETTE, P. N., DEFURIA, F., MILLER, D., GRAZIANO, J. H. & PETERSON, M. (1973). Effect of cyanate on red blood cell sickling. *Fedn Proc. Fedn Am. Soc. exp. Biol.* **32**, 1668-1672.
- CHANUTIN, A. & CURNISH, R. (1967). Effect of organic and inorganic phosphates on the oxygen equilibrium of human hemoglobin. *Archs Biochem. Biophys.* **121**, 96-101.
- FYHN, U. E. H. & SULLIVAN, B. (1975). Elasmobranch hemoglobins: dimerization and polymerization in various species. *Comp. Biochem. Physiol.* **50B**, 119-129.
- GEOGHEGAN, W. D. & POLUHOWICH, J. J. (1974). The major erythrocytic organic phosphates in the American eel. *Comp. Biochem. Physiol.* **49B**, 281-290.
- HILL, A. V. (1910). The possible effect of the aggregation of haemoglobin on its dissociation curves. *J. Physiol., Lond.* **40**, iv-vii.
- HUNTER, F. R. (1976). Permeability of trout erythrocytes to nonelectrolytes. *Biol. Bull. mar. biol. Lab., Woods Hole*, **151**, 322-330.
- JOKUMSEN, A. & WEBER, R. E. (1980). Haemoglobin-oxygen binding properties in the blood of *Xenopus laevis* with special reference to the influences of aestivation and of temperature and salinity acclimation. *J. exp. Biol.* **86**, 19-37.
- KILMARTIN, J. V. & WOOTON, J. F. (1970). Inhibition of Bohr effect after removal of C-terminal histidines from haemoglobin  $\beta$ -chains. *Nature, Lond.* **228**, 766-767.
- KONO, M. & HASHIMOTO, K. (1977). Organic phosphates in the erythrocytes of fishes. *Bull. Jap. Soc. scient. Fish.* **43**, 1307-1312.
- KRICHEVSKAYA, A. A., LUKASH, A. I. & KARTASHEVA, L. D. (1973). The association of urea with proteins at low concentrations. *Biokhimiya* (English translation) **38**, 585-590.
- LENFANT, C. & JOHANSEN, K. (1966). Respiratory functions in the elasmobranch *Squalus suckleyi* G. *Respir. Physiol.* **1**, 13-29.
- LERAY, C. (1979). Patterns of purine nucleotides in fish erythrocytes. *Comp. Biochem. Physiol.* **64B**, 77-82.
- MANWELL, C. (1963). Fetal and adult hemoglobins of the spiny dogfish *Squalus suckleyi*. *Archs Biochem. Biophys.* **101**, 501-511.
- MARTIN, J. P., BONAVENTURA, J., FYHN, H. J., FYHN, U. E. H., GARLICK, R. L. & POWERS, D. A. (1979). Structural and functional studies of hemoglobins isolated from Amazon stingrays of the genus *Potamotrygon*. *Comp. Biochem. Physiol.* **62A**, 131-138.
- MUMM, D. P., ATHA, D. H. & RIGGS, A. (1978). The hemoglobin of the common sting-ray *Dasyatis sabina*: Structural and functional properties. *Comp. Biochem. Physiol.* **60B**, 189-193.
- PARKS, R. E., BROWN, P. R., CHENG, Y.-C., AGARWAL, K. C., KONG, C. M., AGARWAL, R. P. & PARKS, C. C. (1973). Purine metabolism in primitive erythrocytes. *Comp. Biochem. Physiol.* **45B**, 355-364.
- PENNELLY, R. R., NOBLE, R. W. & RIGGS, A. (1975). Equilibria and ligand binding kinetics of hemoglobins from the sharks, *Prionace glauca* and *Carcharhinus milberti*. *Comp. Biochem. Physiol.* **52B**, 83-87.
- PETERSEN, A. J. & POLUHOWICH, J. J. (1976). The effects of organic phosphates on the oxygenation behaviour of eel multiple hemoglobins. *Comp. Biochem. Physiol.* **55A**, 351-354.
- PIPER, J., BAUMGARTEN, D. & MEYER, M. (1970). Effects of hypoxia upon respiration and circulation in the dogfish *Scyliorhinus stellaris*. *Comp. Biochem. Physiol.* **36**, 513-520.
- PLESCHKA, K. & WITTENBROCK, I. (1971). The solubility of carbon dioxide in elasmobranch plasma between 10°C and 22°C. *Pflügers. Arch. ges. Physiol.* **329**, 186-190.
- ROSSI-FANELLI, A., ANTONINI, E. & CAPUTO, A. (1964). Hemoglobin and Myoglobin. *Adv. Protein Chem.* **19**, 74-222.
- WEBER, R. E. (1981). Cationic control of O<sub>2</sub> affinity in lugworm erythrocytes. *Nature, Lond.* **292**, 386-387.
- WEBER, R. E. (1982). Intraspecific adaptation of hemoglobin function in fish to oxygen availability. In *Exogenous and Endogenous Influences on Metabolic and Neutral Control.*, Vol. 1, (eds A. D. F. Addink & N. Spronk), pp. 87-102. Oxford: Pergamon.
- WEBER, R. E., JOHANSEN, K., LYKKEBOE, G. & MALOY, G. M. O. (1977). Oxygen-binding properties of hemoglobins from estivating and active african lungfish. *J. exp. Zool.* **199**, 85-96.
- WEBER, R. E. & LYKKEBOE, G. (1978). Respiratory adaptations in carp blood. Influences of hypoxia, red cell organic phosphates, divalent cations and CO<sub>2</sub> on hemoglobin-oxygen affinity. *J. comp. Physiol.* **128**, 127-137.
- WEBER, R. E., LYKKEBOE, G. & JOHANSEN, K. (1975). Biochemical aspects of the adaptation of hemoglobin-oxygen affinity of eels to hypoxia. *Life Sciences* **17**, 1345-1350.
- WEBER, R. E., LYKKEBOE, G. & JOHANSEN, K. (1976). Physiological properties of eel haemoglobin: Hypoxic acclimation, phosphate effects and multiplicity. *J. exp. Biol.* **64**, 75-88.
- WEBER, R. E., WOOD, S. C. & LOMHOLT, J. P. (1976). Temperature acclimation and oxygen-binding properties of blood and multiple haemoglobins of rainbow trout. *J. exp. Biol.* **65**, 333-345.
- WELLS, R. M. G. & WEBER, R. E. (1983). Oxygenational properties and phosphorylated metabolic intermediates in blood and erythrocytes of the dogfish, *Squalus acanthias*. *J. exp. Biol.* **103**, 95-108.
- WYMAN, J. (1948). Heme proteins. *Adv. Protein Chem.* **4**, 407-531.
